# Supplementary material for: Ultrahigh-activity immune inducer from Endophytic Fungi induces tobacco resistance to virus by SA pathway and RNA silencing
Source: PubMed Central journal article supplement (PMC7160901; doi:10.1186/s12870-020-02386-4), 2020-04-15

**A**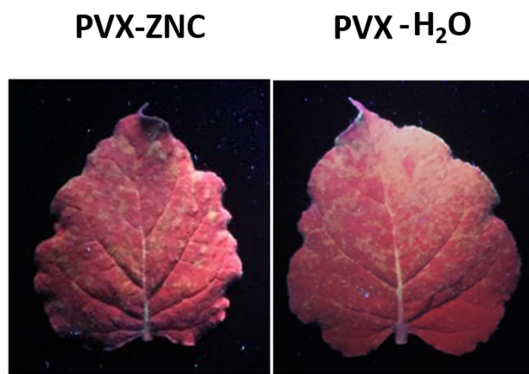**B**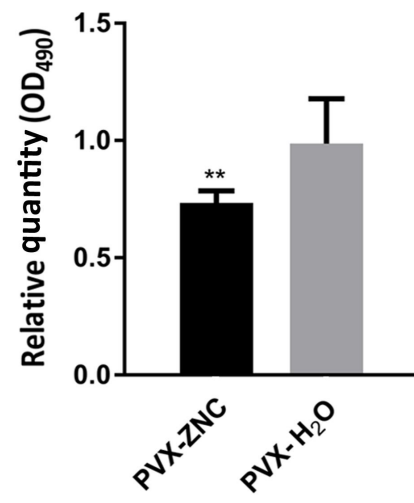

Supplement: 12870_2020_2386_MOESM2_ESM.pdf [file 12870_2020_2386_MOESM2_ESM.pdf]
