# Supplementary material for: Ultrahigh-activity immune inducer from Endophytic Fungi induces tobacco resistance to virus by SA pathway and RNA silencing
Source: PubMed Central journal article supplement (PMC7160901; doi:10.1186/s12870-020-02386-4), 2020-04-15
Supplement: 12870_2020_2386_MOESM7_ESM.pdf [file 12870_2020_2386_MOESM7_ESM.pdf]

Table S1 primers used for sequencing in the present study.

| Sequencing primers     | Primer sequence (5'-3')   |
|------------------------|---------------------------|
| <i>Nb actin</i> F      | TTGGCTTACATTGCTCTTG       |
| <i>Nb actin</i> R      | TCATTGATGGTTGGAACAG       |
| qRT- <i>NbCAT</i> F    | CACTCACCTTACCTGTGCTG      |
| qRT- <i>NbCAT</i> R    | GAACTTCATTCCATCACGG       |
| qRT- <i>NbAPX</i> F    | CATCAGGCTATTGGAACCC       |
| qRT- <i>NbAPX</i> R    | GCTCTGTCTTGTCTCTCTACC     |
| qRT- <i>NbSOD</i> F    | GCAGCAGTGAAGGTGTTAGC      |
| qRT- <i>NbSOD</i> R    | GGATTGTAATGTGGTCCCG       |
| qRT- <i>NbRbohA</i> F  | CATAACTACTTGACGAGTG       |
| qRT- <i>NbRbohA</i> R  | CTGGTGCCTGATACAATA        |
| qRT- <i>NbRbohB</i> F  | CACTATGCTTCAGTCTCTTC      |
| qRT- <i>NbRbohB</i> R  | GTCTTAGTTCTTTGGTCAG       |
| qRT- <i>NbPAL</i> F    | CTCAAGTTGCGGCTATTG        |
| qRT- <i>NbPAL</i> R    | CATTCTTGGTCCTTCTATGTG     |
| qRT- <i>NbICS</i> F    | CAGTTGAAGAGCAGATAGAAG     |
| qRT- <i>NbICS</i> R    | AAGTTCCATTGAAGCACATT      |
| qRT- <i>NbPR-1A</i> F  | CAGCTTGATGTATGATCTGATAT   |
| qRT- <i>NbPR-1A</i> W  | CTGGTAGATTATATGAACTGTGTAA |
| qRT- <i>NbWRKY40</i> F | TTAGTCCTAAAGGTGGCAATA     |
| qRT- <i>NbWRKY40</i> W | TGTCTGATTATTATGTTGGAGATT  |
| qRT- <i>NbWRKY51</i> F | AAGAAAGAGAAGATGAATGAAAGA  |
| qRT- <i>NbWRKY51</i> W | GCACTTGTAGTAATCCTTAGAT    |
| qRT- <i>NbWRKY70</i> F | ATTCTACCAATAATCATCACCATT  |
| qRT- <i>NbWRKY70</i> W | CACCTATCCAGAACCACATA      |
| qRT- <i>NbRDR6</i> F   | AACTGCTGATGATGATATTGAA    |
| qRT- <i>NbRDR6</i> R   | CTCCACTACCTGTAATGTCT      |

|                       |                     |
|-----------------------|---------------------|
| qRT- <i>NbAgo1a</i> F | ATGAGAGGCAGATAACAG  |
| qRT- <i>NbAgo1a</i> R | CAGCATAAGCATTGTGAT  |
| qRT- <i>NbAgo6</i> F  | CTGCTTCTGGACTTCTATA |
| qRT- <i>NbAgo6</i> R  | ACTTGACTGAACTGTGAT  |
| qRT- <i>NbAgo7</i> F  | TGCTGTAGTTGGTAATGTG |
| qRT- <i>NbAgo7</i> R  | ATCTCCTGCCTATGTGTT  |
| qRT- <i>NbAgo10</i> F | AGCAAGCAAGCCAGTTAT  |
| qRT- <i>NbAgo10</i> R | GAACCAGCAGCCACTAAT  |
| qRT- <i>NbDCL1</i> F  | ACTCCAATCATACATCCA  |
| qRT- <i>NbDCL1</i> R  | GTCATACACAGGTAACAC  |
| qRT- <i>NbDCL3</i> F  | TTATGCTGCTGTGAAGAG  |
| qRT- <i>NbDCL3</i> R  | CAAGAATCAGAGACCAACT |
| qRT- <i>NbDCL4</i> F  | TATTCATTCGTCCATAAG  |
| qRT- <i>NbDCL4</i> R  | ACACAGAGTATAGATAGG  |

Table S2 The number of reads obtained from each sample. ZNC / H<sub>2</sub>O: the treatment with ZNC or distilled water.

| Samples            | Raw_reads | Clean_reads |
|--------------------|-----------|-------------|
| ZNC_1              | 49705072  | 6918284150  |
| ZNC_2              | 49715752  | 6928642160  |
| ZNC_3              | 49138846  | 6845500008  |
| H <sub>2</sub> O_1 | 49091720  | 6815317964  |
| H <sub>2</sub> O_2 | 49347032  | 6865097565  |
| H <sub>2</sub> O_3 | 49673408  | 6906031776  |
